# Supplementary material
Source: publisher site journal article supplement (https://www.spandidos-publications.com/1601/downloadSupplementary)

Figure S1. Cisplatin treatment affected the expression of PFK-1, TOMM20 and MCT-1 in FaDu cells. Western blotting was used to detect the expression of PFK-1, TOMM20 and MCT-1 after challenge with 5  $\mu$ g/ml cisplatin at 0, 12, 24 and 48 h in FaDu cells. (A) Western blotting detected bands of PFK-1, TOMM20 and MCT-1. (B) Quantification analysis of PFK-1, TOMM20 and MCT-1 relative to  $\beta$ -actin. \* $P$ <0.05 vs. expression of PFK-1, TOMM20 and MCT-1 at 0 h. PFK-1, phosphofructokinase; TOMM20, translocase of outer mitochondrial membrane 20; MCT1, monocarboxylase transporter 1.

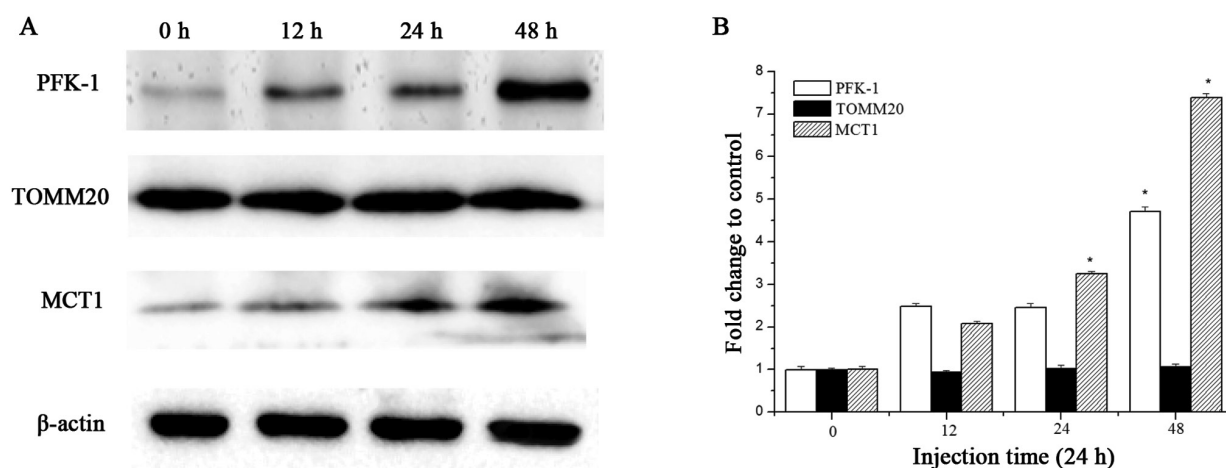

Supplement: Supplementary file 1 [file downloadSupplementary]
